1 **Diffusion or advection? Mass transfer and diffusive boundary**  
2 **layer landscapes of the brown alga *Fucus vesiculosus***

3

4 Mads Lichtenberg<sup>a,1,2</sup>; [mads.lichtenberg@bio.ku.dk](mailto:mads.lichtenberg@bio.ku.dk), +45 3533 0185

5 Rasmus Dyrmosø Nørregaard<sup>b,1</sup>; [rdyn@bios.au.dk](mailto:rdyn@bios.au.dk)

6 Michael Kühl<sup>a,c</sup>; [mkuhl@bio.ku.dk](mailto:mkuhl@bio.ku.dk)

7

8 <sup>a</sup> Marine Biological Section, Department of Biology, University of Copenhagen,  
9 Strandpromenaden 5, DK-3000 Helsingør, Denmark.

10 <sup>b</sup> Arctic Research Center, Department of Bioscience, Faculty of Science and Technology,  
11 Aarhus University, Frederiksborgvej 399, 4000 Roskilde, Denmark.

12 <sup>c</sup> Climate Change Cluster, University of Technology Sydney, PO Box 123, Ultimo  
13 Sydney NSW 2007, Australia.

14

15 Running title: DBL landscapes around *Fucus vesiculosus*

16

17 <sup>1</sup> These authors contributed equally to this work

18 <sup>2</sup> Corresponding author,

19

20

21

22

23 **Abstract**

24 The role of hyaline hairs on the thallus of brown-algae in the genus *Fucus* is long debated  
25 and several functions have been proposed. We used a novel motorized setup for 2D- and  
26 3D-mapping with O<sub>2</sub>-microsensors to investigate the spatial heterogeneity of the diffusive  
27 boundary layer (DBL) and O<sub>2</sub> flux around single and multiple tufts of hyaline hairs on  
28 the thallus of *Fucus vesiculosus*. Flow was a major determinant of DBL thickness, where  
29 higher flow decreased DBL thickness and increased O<sub>2</sub> flux between algal thallus and the  
30 surrounding seawater. However, the topography of the DBL varied and did not directly  
31 follow the contour of the underlying thallus. Areas around single tufts of hyaline hairs  
32 exhibited both increased and decreased DBL thickness as compared to areas over smooth  
33 thallus surfaces. Over thallus areas with several hyaline hair tufts, the overall effect was  
34 a local increase in the DBL thickness. We also found indications for advective O<sub>2</sub>  
35 transport driven by pressure gradients or vortex-shedding downstream from dense tufts  
36 of hyaline hairs alleviating local mass-transfer resistance imposed by thickened DBL.  
37 Mass-transfer dynamics around hyaline hair tufts are thus more complex than hitherto  
38 assumed and may have important implications for algal physiology and plant-microbe  
39 interactions.

40

41 **Keywords:** biological fluid mechanics, diffusive boundary layer, macroalgae, mass  
42 transfer, oxygen, topography.

43

## 44 **Introduction**

45 Aquatic macrophytes are limited compared to their terrestrial counterparts by the  $\sim 10^4$   
46 slower diffusion and a much lower solubility of gases in water than in air [1, 2]. The  
47 efficient exchange of nutrients and gases is further exacerbated by the diffusive boundary  
48 layer (DBL) surrounding all submersed surfaces [3]. The thickness and topography of  
49 diffusive boundary layers around submerged impermeable objects is affected by flow  
50 velocity and surface topography [3]. Higher flow velocities decrease the DBL thickness  
51 by exerting a higher shear stress on the viscous sublayer near the surface. The effect of  
52 surface roughness on DBL thickness is variable, where angled planes facing the flow  
53 generally will have decreased boundary layers, while the DBL downstream of protruding  
54 structures will have increased boundary layers. At the same time, the effect of surface  
55 roughness on mass transfer across a boundary layer is dichotomous, where a thicker DBL  
56 will decrease mass transfer, while surface roughness tends to increase the overall surface  
57 area increasing mass transfer [3]. In microsensor-based studies of the DBL, it is important  
58 to note that the presence of the microsensor tip in itself can affect the local DBL thickness  
59 [4], where flow acceleration around the microsensor shaft will compress the local DBL  
60 thickness leading to locally enhanced  $O_2$  fluxes in the order of 10%. However, this effect  
61 is only significant when investigated on smooth surfaces, while a clear effect is apparently  
62 undetectable when measured over tufts in e.g. a cyanobacterial mat [5].

63 It has been estimated that the DBL accounts for up to 90% of the resistance to carbon  
64 fixation in freshwater plants [6], and structural- and biochemical regulations to alleviate  
65 such mass transfer resistance have evolved across lineages. Some aquatic macrophytes  
66 have e.g. developed i) thinner leaves and a reduced cuticle that decreases the diffusion  
67 path length to chloroplasts, ii) carbon concentrating mechanisms that increase internal  
68 carbon concentration, and iii) the ability to utilize  $HCO_3^-$  which constitutes the largest  
69 fraction of dissolved inorganic carbon at ocean pH ([7], [8] and references therein). In  
70 photosymbiotic corals it has also been proposed that vortical ciliary flow can actively  
71 enhance mass transfer between the coral tissue and the surrounding water in stagnant or  
72 very low flow regimes with concomitant thick diffusive boundary layers [9].

73 Hyaline hairs, i.e., colourless, filamentous multicellular structures, are often observed as  
74 whitish tufts on the thallus of brown macroalgae in the genus *Fucus*. The hairs originate  
75 and are anchored in cryptostomatal cavities on the apical- and mid-regions of the thallus

76 [10]. It is recognized that hyaline hairs aid in the uptake of nutrients [11, 12] e.g. during  
77 springtime, when photosynthetic potential is higher due to increased light levels and the  
78 need for nutrients apparently triggers growth of hyaline hairs [10].  
79 How hyaline hairs affect solute exchange and nutrient acquisition in *Fucus* is still debated,  
80 although a number of suggestions currently exist in the literature suggesting that: i) the  
81 hairs increase the algal surface area available for nutrient uptake, albeit this is probably  
82 not the major limitation on nutrient uptake [11]; ii) the hyaline hairs might decrease the  
83 diffusive boundary layer (DBL) due to turbulence created by the hairs as water flows  
84 across them, decreasing the mass resistance imposed by the DBL [11]; iii) the thin cell  
85 walls of the hairs relative to the thallus could have less resistance to the passage of ions  
86 [13, 14]; iv) the hyaline hairs increase DBL thickness, thereby retaining the products of  
87 thallus surface-active enzymes such as extracellular phosphatases and ensuring more  
88 efficient nutrient uptake [14].  
89 There can be no doubt, however, that the DBL has great importance for macroalgal  
90 growth rates. The mass resistance imposed by the DBL has been correlated with nutrient  
91 limitation for the giant kelp *Macrocystis pyrifera* [15], and a considerable spatial variation  
92 of the DBL over thallus and cryptostomata of *Fucus vesiculosus* has been observed [16].  
93 However, current knowledge of the DBL characteristics of aquatic plants is largely based  
94 on point measurements with O<sub>2</sub> microsensors [14], while it is known from boundary layer  
95 studies in biofilms [17], corals [18-20] and sediments [17, 21-23] that the DBL exhibits  
96 a spatio-temporal heterogeneity, which is modulated by both flow velocity and surface  
97 topography. Similar studies of DBL topography are very limited in aquatic plant science  
98 [24] and the aim of this study was to explore how the DBL thickness and the local O<sub>2</sub> flux  
99 varied spatially over the thallus of *F. vesiculosus* with and without tufts of hyaline hairs.  
100 Such first time exploration of the 3D DBL topography was done with O<sub>2</sub> microsensors  
101 mounted in a fully automated motorized micromanipulator system that allowed  
102 measurements of DBL transects and grids over the thallus of *F. vesiculosus* (Fig. S1). Our  
103 results reveal a complex DBL landscape over the algal thallus, where mass transfer across  
104 the DBL apparently can be supplemented by advective processes due to the presence of  
105 hyaline hairs.  
106

## 107 **Materials and Methods**

### 108 Sampling and experimental setup

109 Specimens of *Fucus vesiculosus* and seawater used in the experimental setup were  
110 sampled on the day of usage at <1 m depth at Kronborg, Helsingør, Denmark from May  
111 through August. If the influence of a single tuft of hyaline hairs on the DBL was  
112 measured, the surface of the thallus surrounding the tuft was carefully shaved off any  
113 additional tufts with a scalpel and observation under a dissection microscope to avoid  
114 thallus damage. When the influence of multiple tufts was analysed, the thallus was left  
115 intact. Prior to measurements, a piece of *F. vesiculosus* thallus with hyaline hairs was  
116 fixed on a slab of agar (~1.5% w/w in seawater) in a small flow chamber creating a  
117 defined unidirectional flow of seawater across the thallus surface [16]. The flow chamber  
118 was connected via tubing to a submersible water pump in a continuously aerated seawater  
119 reservoir tank underneath the flow chamber. Flow velocities were adjusted by restricting  
120 water flow to the flow chamber, and flow velocity was determined by collecting water  
121 from the flow chamber outlet for one minute, where after the sampled volume per time  
122 was divided by the cross sectional area of the flow chamber to obtain an estimate of the  
123 mean free flow velocity. All measurements were done with flow velocities of either 1.65  
124 cm s<sup>-1</sup> or 4.88 cm s<sup>-1</sup>.

125 The sample was illuminated from above with light from a halogen lamp (Schott KL-  
126 2500LCD) equipped with a collimating lens yielding a downwelling photon irradiance  
127 (400-700 nm) of ~350 μmol photons m<sup>-2</sup> s<sup>-1</sup>, as measured with a quantum irradiance meter  
128 (LI-250, LiCor Inc., USA).

129

### 130 Microsensor measurements

131 Measurements of O<sub>2</sub> concentration above the thallus of *F. vesiculosus* were done with  
132 Clark type O<sub>2</sub> microelectrodes (tip diameter 10 μm, OX10, Unisense A/S, Denmark;  
133 Revsbech 1989) with a response time of 1-3 seconds and low stirring sensitivity (<2%).  
134 The microelectrode was connected to a pA meter (PA2000, Unisense A/S, Denmark) and  
135 sensor signals from the pA meter were acquired on a PC via a parallel port -connected  
136 A/D converter (ADC-101, Pico Technologies Ltd., England). The O<sub>2</sub> microsensor was  
137 mounted in a custom built micromanipulator setup enabling motorized positioning at  
138 defined x, y and z coordinates at ~1 μm resolution by use of 3 interconnected motorized

139 positioners (VT-80, Micos GmbH, Germany) and controllers (MoCo DC, Micos GmbH,  
140 Germany). Data acquisition and positioning was controlled by a custom made software  
141 (Volfix) programmed in LabView (National Instruments, Japan).  
142 The O<sub>2</sub> microelectrode signal was linearly calibrated at experimental temperature  
143 (~17°C) and salinity (S=16) from measurements in air saturated seawater and in seawater  
144 made anoxic by addition of sodium dithionite. The O<sub>2</sub> concentration in air saturated  
145 seawater, C<sub>0</sub>, and the molecular diffusion coefficient of O<sub>2</sub>, D<sub>0</sub>, in seawater at  
146 experimental temperature and salinity was taken from tabulated values (Unisense A/S,  
147 Denmark) as C<sub>0</sub> = 274 μmol O<sub>2</sub> L<sup>-1</sup> and D<sub>0</sub> = 1.87·10<sup>-5</sup> cm<sup>2</sup> s<sup>-1</sup>.

148

#### 149 Mapping of diffusive boundary layers

150 The diffusive boundary layer (DBL) around tufts of hyaline hairs anchored in  
151 cryptostomata of *F. vesiculosus* was mapped as 2D transects and 3D grid measurements  
152 of O<sub>2</sub> concentration profiles. The Volfix software enabled us to specify a measuring  
153 grid/transect with any number of sampling points in the x, y and z-directions. In this study,  
154 the y-direction corresponds to the direction of flow (where negative values indicate  
155 distance behind a single tuft of hyaline hair), the x-direction corresponds to the width of  
156 the flow chamber, and the z-direction corresponds to the height above the thallus surface  
157 (Fig. S1). The approximate height and radius of the hyaline hairs was approximated by  
158 manual manipulation of the microelectrode tip relative to the structures as observed under  
159 a stereomicroscope (SV6, Zeiss, Germany). Thallus samples were placed in the flow  
160 chamber with the length of the thallus oriented along the direction of flow, i.e., the y-  
161 direction.

162 *2D DBL transects.* For 2D transect measurements, the O<sub>2</sub> microelectrode tip was  
163 positioned manually as close to the centre of the selected cryptostomata with hyaline hairs  
164 as possible using a dissection microscope for observation; this position was set to y=0 in  
165 the Volfix measuring software. The transect measurements started 2 mm upstream (y=2  
166 mm) from the cryptostomata and 1 mm above the hyaline hairs (Point A in Fig. S1D),  
167 and ended 4 mm downstream (y=-4 mm). Transects of O<sub>2</sub> concentration profiles were  
168 measured at a lateral resolution of 0.5 mm in the y-direction, with vertical O<sub>2</sub>  
169 concentration profiles done at each transect point in steps of 0.1 mm in the z-direction.  
170 All profile measurements started at the same z-position and were finished in the upper

171 thallus layer, where a characteristic jump in the O<sub>2</sub> concentration, due to the physical  
172 impact of the O<sub>2</sub> microsensor and the solid thallus surface, enabled precise determination  
173 of the thallus surface.

174 *3D DBL grids.* For measuring 3D grids of O<sub>2</sub> concentration profiles over thallus areas  
175 with only one tuft of hyaline hairs, 9 transects covering a 24 mm<sup>2</sup> sampling grid area  
176 around a central tuft of hairs was set up (Fig. S1E) for O<sub>2</sub> measurements at 0.5 mm lateral  
177 resolution (x and y direction) and 0.1 mm vertical resolution (z-direction). Measurements  
178 started ~1 mm above the hyaline hairs (Fig. S1E).

179 For measurements of 3D grids of O<sub>2</sub> concentration profiles over larger thallus areas with  
180 multiple tuft of hyaline hairs, an oblong 12 mm by 2 mm measuring grid was set up.  
181 Oxygen measurements were done at a lateral resolution of 0.5 mm (x and y directions)  
182 and a vertical resolution of 0.2 mm (z direction). Tufts of hyaline hair were scattered  
183 across the thallus, and the starting point of the grid measurement was set randomly, but  
184 with the same starting point for both the 1.65 cm s<sup>-1</sup> and 4.88 cm s<sup>-1</sup> measurements.

185 Due to the length of measurements different thallus samples were used for individual  
186 experiments.

187

### 188 Diffusive boundary layer thickness and calculations

189 There are different ways of determining the effective thickness of the diffusive boundary  
190 layer from O<sub>2</sub> microsensor measurements [17]. The DBL thickness is often found by  
191 extrapolating the linear O<sub>2</sub> gradient in the DBL to the bulk concentration of the free-flow  
192 region. The distance from the surface to the intersection of the extrapolated linear gradient  
193 and the bulk concentration is denoted the effective diffusive boundary layer thickness, Z<sub>δ</sub>  
194 [3]. However, analysing large numbers of O<sub>2</sub> profiles in this manner is very time  
195 consuming, and a somewhat faster determination can be done by defining Z<sub>δ</sub> as the  
196 distance between the surface and the vertical position above the surface where the O<sub>2</sub>  
197 concentration has changed 10% relative to the O<sub>2</sub> concentration in the bulk water.  
198 Estimations of Z<sub>δ</sub> via this method were found to differ <10% from more precise  
199 determinations [17].

200 The diffusive flux of O<sub>2</sub> across the DBL, J (in units of nmol O<sub>2</sub> cm<sup>-2</sup> s<sup>-1</sup>) was calculated  
201 from steady state O<sub>2</sub> concentration profiles using Fick's 1<sup>st</sup> law:

202

203  $J = D_0(C_\infty - C_0)/Z_\delta$  (Eq. 1)

204

205 where  $C_\infty$  is the  $O_2$  concentration in the free-flow region ( $\mu\text{mol } O_2 \text{ L}^{-1} = \text{nmol } O_2 \text{ cm}^{-3}$ ),  
206  $C_0$  is the  $O_2$  concentration at the thallus surface ( $\mu\text{mol } O_2 \text{ L}^{-1}$ ),  $Z_\delta$  is the effective DBL  
207 thickness (cm), and  $D_0$  is the molecular diffusion coefficient of  $O_2$  in seawater ( $\text{cm}^2 \text{ s}^{-1}$ ).  
208 To compensate for the uneven surface of thalli, measurements below the thallus surface  
209 are not shown on final transects. The depth axis on transects is therefore denoted  $z' = z -$   
210  $z_0$ , where  $z$  is the  $z$ -coordinate from the sample data, and  $z_0$  is the  $z$ -coordinate of the  
211 thallus surface. The thallus surface position was determined from the intermittent sudden  
212 drop in  $O_2$  concentration when the microsensor pushed against the thallus surface cortex.  
213 Maps of  $O_2$  concentration,  $Z_\delta$ , and  $J$  were generated from measured transects and grids  
214 using data interpolation software (Kriging gridding method using default settings, i.e.  
215 Linear Variogram and Point Kriging, Surfer v.8, Golden Software Inc., USA).

216

### 217 Statistics

218 Two-way ANOVAs were applied to test differences in the mean  $Z_\delta$  over *F. vesiculosus*  
219 between flow rates and light conditions (light/dark). For significant main effects (flow  
220 rate and/or light condition) and interaction effects, Tukey's multiple comparisons post  
221 hoc test was applied. Two-way ANOVAs were applied to test differences between mean  
222  $O_2$  flux values between flow rates and thallus condition (single or multiple tufts). For  
223 significant main effects (flow rate and/or thallus condition) and interaction effects,  
224 Tukey's multiple comparisons post hoc test was applied. Statistical analysis was  
225 performed using Rstudio (Rstudio version 0.99.491, 2016) with the level of significance  
226 set to  $p < 0.05$ .

227

## 228 **Results**

### 229 The DBL around single tufts of hyaline hairs

230 Isopleths of  $O_2$  concentration in the water column above the thalli showed a local increase  
231 in effective DBL thickness,  $Z_\delta$  associated with the hyaline hair tuft (Fig. 1), with highest  
232  $Z_\delta$  values located downstream from the hyaline hairs, either directly behind the tuft or  
233 even within the expanse of the hyaline hairs. In light ( $350 \mu\text{mol photons m}^{-2} \text{ s}^{-1}$ ), and at a  
234 flow of  $1.65 \text{ cm s}^{-1}$ ,  $Z_\delta$  reached a maximum thickness of 1.2 mm downstream relative to



235 the tuft at  $y = -0.5$  mm (Fig. S2, S3A), while under a flow of  $4.88 \text{ cm s}^{-1}$ , the maximum  
236  $Z_{\delta}$  was reduced to  $0.6$  mm at  $y = -2.5$  mm (Fig. S3A). In darkness, the maximal  $Z_{\delta}$  values  
237 were  $0.9$  mm and  $0.4$  mm at  $y = -2$  mm and  $y = 0$  mm under flows of  $1.65$  and  $4.88 \text{ cm s}^{-1}$ ,  
238 respectively. The mean  $Z_{\delta}$  did not change significantly ( $p < 0.05$ ) between measurements  
239 in light and darkness (Fig. S3B) under low flow ( $Z_{\delta(\text{Light})} = 0.72$  mm,  $Z_{\delta(\text{Dark})} = 0.58$  mm;  
240  $p \text{ adj} = 0.26$ ) or high flow ( $Z_{\delta(\text{Light})} = 0.36$  mm,  $Z_{\delta(\text{Dark})} = 0.18$  mm;  $p \text{ adj} = 0.13$ ). However,  
241 flow velocity had a significant effect on the mean  $Z_{\delta}$  that was significantly thinner under  
242 high flow ( $4.88 \text{ cm s}^{-1}$ ) as compared to the low flow ( $1.65 \text{ cm s}^{-1}$ ) ( $p \text{ adj} < 0.001$  for both  
243 main effects).

244 The hyaline hairs affected  $Z_{\delta}$  downstream from the hair tuft (Fig. 1A,B) causing a  
245 thickening of the DBL that also expanded perpendicular to the flow direction (Fig. 1C,D),  
246 reaching a maximum expansion at  $y = -2$  mm at both flows ( $Z_{\delta\text{Max}} = 1.8$  mm for  $1.65 \text{ cm s}^{-1}$   
247 and  $Z_{\delta\text{Max}} = 0.9$  mm for  $4.88 \text{ cm s}^{-1}$ ). Beyond the local peak in boundary layer thickness,  
248 the DBL closely followed the contours of the thallus surface topography. Two transects  
249 measured at higher resolution along the x-axis at  $y = -2$  mm showed that the increase in  $Z_{\delta}$   
250 was roughly identical and extended  $\sim 1$  mm on both sides of the hyaline hair tuft (Fig.  
251 1C,D). At distances  $> 1$  mm away from the local maximum, the DBL thickness  
252 approached a lower more homogeneous DBL thickness over thallus areas unaffected by  
253 the hair tuft.

254 Unexpectedly, a transect of  $\text{O}_2$  concentrations above the illuminated thallus at  $y = -2$  mm  
255 in the x direction, i.e., perpendicular to the flow, showed a local  $\text{O}_2$  increase followed by  
256 a decrease in oxygen concentration that was apparently independent of  $Z_{\delta}$  (Fig. 1C). A  
257 longitudinal transect at  $x = -0.5$  mm along the y-direction, i.e., the flow direction, showed  
258 further indications of an apparent local “upwelling” of  $\text{O}_2$  into the transition zone between  
259 the DBL and the fully mixed water column protruding downstream from the hyaline hair  
260 tuft (Fig. 2). We found such “upwelling” zones most pronounced under low flow located  
261  $\sim 2$  mm downstream from the centre of the tuft and extending several mm into the water  
262 column with  $\text{O}_2$  concentrations reaching up to  $> 2$  times air saturation in some cases (Fig.  
263 2A).

264

265 The DBL around multiple tufts of hyaline hairs

266 3D grid measurements of O<sub>2</sub> concentration over a *F. vesiculosus* thallus with several tufts  
267 of hyaline hairs spaced at approximately 2-5 mm distance were done to investigate  
268 potential combined effects of multiple tufts on the DBL. Such measurements showed that  
269 the smooth local thickening of the DBL around a single hyaline tuft relative to the DBL  
270 of the smooth thallus was altered in the presence of multiple tufts (Fig. 3). The DBL  
271 topography was more heterogeneous with Z<sub>δ</sub> varying >1 mm reaching a maximum  
272 thickness of >2.5 mm under low flow and >1.5 mm under high flow, respectively. The  
273 DBL topography was apparently largely determined by the interaction between flow and  
274 the tufts of hyaline hairs under low flow, while the smooth thallus surface topography led  
275 to local minima in Z<sub>δ</sub> in-between individual tufts at higher flow velocity (Fig. 3B).

276 Transects of O<sub>2</sub> concentrations at x=1 mm (extracted from the 3D grids in Fig. 3A,B)  
277 gave a detailed information on how O<sub>2</sub> concentration varied over the thallus with distance  
278 along the thallus in the flow direction (Fig. 3C,D). In light, the thallus surface O<sub>2</sub>  
279 concentration reached >900 μM in both flows, while the O<sub>2</sub> concentration in the transient  
280 zone of the DBL (z=0.7 mm) varied between 350 and 750 μM under low flow and  
281 between 300 and 550 μM in high flow, respectively, clearly demonstrating a compression  
282 of the boundary layer and more effective O<sub>2</sub> exchange between thallus and water under  
283 higher flow.

284 However, the thickening of the 300-350 μM O<sub>2</sub> contour areas e.g. at y=-11 mm and y=-  
285 6 mm (Fig. 3C) was due to gradual increasing O<sub>2</sub> concentrations from the bulk water  
286 towards the upper part of the DBL (data not shown). This creates an artefact in the precise  
287 determination of Z<sub>δ</sub> by the method proposed by Jørgensen and Des Marais [17] that will  
288 overestimate the local DBL thickness e.g. compared to the local profile in y=-1 mm where  
289 a more steady O<sub>2</sub> increase was measured.

290

291 Diffusive O<sub>2</sub> fluxes over the *Fucus* thallus with single and multiple tufts

292 Although inconsistencies were found (e.g. in the area around x = -1.5 mm, y = 1.5mm in  
293 Fig. 4A,B), increases in DBL thickness generally correlated with a decrease in O<sub>2</sub> flux,  
294 and the flow-dependent DBL topography strongly affected the O<sub>2</sub> flux from the  
295 illuminated *F. vesiculosus* thallus.

296 Comparing the O<sub>2</sub> fluxes in transects over the *F. vesiculosus* thallus with single and  
297 multiple tufts of hyaline hairs (Fig. 5A,B) showed an increased O<sub>2</sub> flux just upstream to  
298 the position of the hyaline hair tufts independent of the flow velocity. The flux values  
299 generally correlated with the DBL thickness and the flux gradually decreased downstream  
300 relative to the hair tuft. However, some local variations were seen in areas exhibiting less  
301 uniform increases in O<sub>2</sub> concentration towards the thallus surface.

302 The average O<sub>2</sub> flux calculated from transects over *F. vesiculosus* thalli with single and  
303 multiple hyaline hair tufts (Fig. 5C,D) showed that flow was the major determinant of gas  
304 exchange between macroalga and the surrounding seawater. Both in measurements over  
305 single and multiple hair tufts, the O<sub>2</sub> flux values were higher in high flow treatments as  
306 compared to low flow (p adj <0.001). The O<sub>2</sub> fluxes measured around a single hair tuft  
307 under high flow were higher than the corresponding measurements over multiple tufts  
308 treatment (Fig. 5C,D; p adj <0.001). However, the flux values in the multiple tuft  
309 treatments were averaged over a two times larger distance (Fig. 5C; 12 mm), and thus  
310 include the combined effect of multiple tufts and DBL variation over these, while the  
311 values of the single tuft treatments (Fig. 5D; 6mm) only reflect the DBL effects on O<sub>2</sub>  
312 flux immediately downstream from the hair tuft.

313

## 314 **Discussion**

315 In our measurements around single tufts of hyaline hairs, the DBL followed the contour  
316 of the smooth thallus surface, except around the hair tufts where a thickening occurred  
317 downstream of tufts and perpendicular to the flow direction, with a concomitant decrease  
318 in the thickness 1-2 mm away from the hair tufts, depending on the flow-regime.

319 In measurements over multiple tufts, the smooth thickening of the DBL observed around  
320 isolated single tufts was absent. This more dynamic DBL landscape is probably caused  
321 by the close vicinity of neighbouring hyaline hair tufts, where the DBL thickness between  
322 tufts never reach 'normal' conditions over a smooth thallus. Interestingly, this suggests  
323 that the effect of multiple hair tufts overall increased the DBL thickness across the thallus.  
324 Intuitively, a thin boundary layer would create physical conditions that could better avoid  
325 high detrimental O<sub>2</sub> concentrations and inorganic carbon limitations in light and O<sub>2</sub>  
326 limitation in darkness. So why does *Fucus* spend metabolic energy on production of  
327 hyaline hairs? In early work by Raven [11], it was suggested that hyaline hairs aid in

328 nutrient uptake by having a highly decreased diffusion resistance over the plasmalemma  
329 compared to the thick algal thallus, and in addition the hairs could protrude through the  
330 viscous sublayer and into the mainstream flow with better nutrient access. However, as  
331 pointed out by Hurd [14], the thin and flexible hairs are considered unlikely to disrupt the  
332 viscous sublayer and create turbulence themselves. Here we show that across a thallus  
333 with multiple hair tufts, the overall DBL thickness is increased, which has a functional  
334 significance similar to observed DBL effects of epiphytes on submerged macrophytes  
335 [24, 25]. The thickening of the boundary layer thickness creates a mass transfer limitation  
336 that in light can lead to high O<sub>2</sub> concentrations [24, 26] potentially inducing  
337 photorespiration [27] and limiting the inorganic carbon supply [28] to the thallus.  
338 However, such mass transfer limitation would also maintain higher nutrient  
339 concentrations due to surface-associated enzyme activity that can aid in the uptake of e.g.  
340 phosphorous and other nutrients [14, 29].

341 A thicker diffusive boundary layer over thalli with tufts of hyaline hairs could also create  
342 a niche for epibiotic bacteria, and the presence of bacteria on algal thalli is well known  
343 [30-32]. In light of the recently developed ‘holobiont’ concept [32, 33] a physical  
344 structure that would keep the algal associated bacteria more protected and provide them  
345 with metabolic compounds, could present a competitive advantage. Studies of the role of  
346 bacteria in algal life-cycle and metabolism have shown that a strong host specificity of  
347 epiphytic bacterial communities exists, possibly shaped by the algal metabolites as the  
348 primary selective force [34]. Previous studies have e.g. demonstrated the presence of N<sub>2</sub>  
349 fixing cyanobacteria as part of the algal microbiome, and it has also been shown that  
350 native bacteria are required for normal morphological development in some algae [35].  
351 However, the actual distribution and ecological niches of such macroalgae-associated  
352 microbes are not well studied. Spilling et al. (2010) found more pronounced O<sub>2</sub> dynamics,  
353 reaching anoxia during darkness, in the cryptostomata cavities of *F. vesiculosus*, wherein  
354 the hyaline hairs are anchored. Cryptostomata could thus represent potential niches for  
355 bacterial aerobic and anaerobic degradation of organic substrates or O<sub>2</sub>-sensitive N<sub>2</sub>  
356 fixation that warrant further exploration.

357 In some DBL transects measured on light exposed *Fucus* thalli, we observed areas of  
358 enhanced O<sub>2</sub> concentration detached from the boundary layer (Fig. 2). In a previous study,  
359 it was shown that nutrient uptake rates could increase 10-fold when the boundary layer

360 was periodically stripped by passing waves [36]. However, in our case the flow upstream  
361 from the tuft was laminar and no waves or DBL stripping occurred. The observed  
362 phenomenon of enhanced O<sub>2</sub> above the DBL could be explained by a combination of  
363 factors. As flow is obstructed by a physical object a differential pressure field is created  
364 where a local drop in pressure is created around the hyaline hairs due to the locally smaller  
365 cross section of unobstructed flow. Such pressure gradient could create a local advective  
366 upwelling around the area of low pressure thus affecting the O<sub>2</sub> transport. The phenomena  
367 is well described in e.g. sediment transport [37] and plumes of O<sub>2</sub> release have also been  
368 observed before in coral-reef-associated algae *Chaetomorpha sp.* using planar optodes  
369 [38].

370 In addition, so-called vortex shedding (von Kármán vortex sheets) could also be a factor  
371 influencing the observed O<sub>2</sub> release. Shedding of vortices can occur at certain Reynold  
372 numbers at the transition between laminar and turbulent flow when the pressure increases  
373 in the direction of the flow, i.e., in the presence of a so-called adverse pressure gradient  
374 [39]. In our study, the flow upstream from the hyaline hairs was laminar but a transition  
375 to turbulent flow can occur, even at low Reynold numbers, when a certain surface  
376 roughness is present and vortex shedding can initiate at Reynold numbers of ~50 [40].  
377 Using characteristic scales from this study (hyaline hair tuft diameter = 2 mm; free-stream  
378 velocity = 1.65 or 4.88 cm s<sup>-1</sup>; fluid density = 1 kg L<sup>-1</sup> and a dynamic fluid viscosity of  
379 1.08 × 10<sup>-3</sup> Pa s [41], we calculated Reynold numbers of ~30-90. Von Kármán vortices  
380 have previously been connected to flow patterns on the lee side of plant parts [42] and  
381 based on the calculated Reynold numbers the theoretical basis for generation of vortex  
382 shedding [40] due to tufts of hyaline hairs is present in our experimental setup.

383 We thus speculate that a combination of pressure gradient mediated upwelling of O<sub>2</sub> and  
384 vortex shedding (Fig. 6) could explain the observed phenomena in Fig. 2. The local mass  
385 transfer related to the presence of hyaline hair tufts on Furoid macroalgae may thus be  
386 more complex. A more detailed investigation of such phenomena was beyond the scope  
387 of the present study and would clearly require more detailed characterization of the  
388 hydrodynamic regimes over thalli with and without tufts of hyaline hairs.

389 In conclusion, our study of the chemical boundary layer landscape over the thallus of *F.*  
390 *vesiculosus* revealed a strong local effect on the DBL over and around tufts of hyaline  
391 hairs anchored in cryptostomata. Single tufts showed a thickening of the DBL

392 downstream and horizontally relative to the thinner DBL over the smooth thallus surface,  
393 while areas with multiple tufts exhibited a consistently thickened DBL that may affect  
394 gas and nutrient exchanges between the alga and seawater. Furthermore, we also observed  
395 more complex solute exchange phenomena that were apparently driven by pressure  
396 gradients and/or vortex shedding over the hyaline hair tufts. Altogether, this study  
397 demonstrates that interactions between flow and distinct macroalgal surface topography  
398 gives rise to local heterogeneity in the chemical landscape and solute exchange that may  
399 allow for microenvironmental niches harbouring microbial epiphytes facilitating a  
400 diversity of aerobic and anaerobic processes. Further microscale studies of such niches in  
401 combination with e.g. microscopy and molecular detection of microbes in relation to  
402 hyaline hairs and cryptostomata thus seem an important next step to reveal further insights  
403 to the presence and role of the microbiome of Furoid algae.

404

#### 405 **Acknowledgements**

406 This study was supported by grants from the Danish Council for Independent Research |  
407 Natural Sciences (MK), and a PhD stipend from the Department of Biology, University  
408 of Copenhagen (ML). We thank Roland Thar (Pyro-Science GmbH) for his help in  
409 establishing the 3D microsensors measurement setup and software and Erik Trampe for  
410 help with photography of Fig. S1C. The authors declare no conflict of interest and no  
411 competing financial interest.

412

#### 413 **Author contributions**

414 RDN and MK designed the research, RDN and ML performed the research, ML, RDN  
415 and MK analysed data, ML wrote the paper with editorial assistance from RDN and MK.  
416 All authors gave final approval for publication.

## References

- 417 [1] Sand-Jensen, K. & Krause-Jensen, D. 1997 Broad-scale comparison of  
418 photosynthesis in terrestrial and aquatic plant communities. *Oikos* **80**, 203-208. (doi:Doi  
419 10.2307/3546536).
- 420 [2] Maberly, S.C. & Madsen, T.V. 2002 Freshwater angiosperm carbon concentrating  
421 mechanisms: processes and patterns. *Funct Plant Biol* **29**, 393-405.  
422 (doi:10.1071/Pp01187).
- 423 [3] Jørgensen, B.B. & Revsbech, N.P. 1985 Diffusive boundary-layers and the oxygen-  
424 uptake of sediments and detritus. *Limnol Oceanogr* **30**, 111-122.
- 425 [4] Glud, R.N., Gundersen, J.K., Revsbech, N.P. & Jørgensen, B.B. 1994 Effects on the  
426 benthic diffusive boundary-layer imposed by microelectrodes. *Limnol Oceanogr* **39**,  
427 462-467.
- 428 [5] Lorenzen, J., Glud, R.N. & Revsbech, N.P. 1995 Impact of microsensor-caused  
429 changes in diffusive boundary-layer thickness on O<sub>2</sub> profiles and photosynthetic rates in  
430 benthic communities of microorganisms. *Mar Ecol Prog Ser* **119**, 237-241. (doi:DOI  
431 10.3354/meps119237).
- 432 [6] Black, M.A., Maberly, S.C. & Spence, D.H.N. 1981 Resistances to carbon dioxide  
433 fixation in four submerged freshwater macrophytes. *New Phytologist* **89**, 557-568.
- 434 [7] Pedersen, O. & Colmer, T.D. 2014 Underwater photosynthesis and internal aeration  
435 of submerged terrestrial wetland plants. In *Low-oxygen stress in plants - Oxygen*  
436 *sensing and adaptive responses to hypoxia* (eds. J.T. van Dongen & F. Licausi), pp.  
437 315-327. Wien, Austria, Springer Verlag.
- 438 [8] Pedersen, O., Colmer, T.D. & Sand-Jensen, K. 2013 Underwater photosynthesis of  
439 submerged plants - recent advances and methods. *Frontiers in Plant Science* **4**, 140.  
440 (doi:10.3389/fpls.2013.00140).
- 441 [9] Shapiro, O.H., Fernandez, V.I., Garren, M., Guasto, J.S., Debaillon-Vesque, F.P.,  
442 Kramarsky-Winter, E., Vardi, A. & Stocker, R. 2014 Vortical ciliary flows actively  
443 enhance mass transport in reef corals. *Proceedings of the National Academy of Sciences*  
444 **111**, 13391-13396. (doi:10.1073/pnas.1323094111).
- 445 [10] Hurd, C.L., Galvin, R.S., Norton, T.A. & Dring, M.J. 1993 Production of hyaline  
446 hairs by intertidal species of *Fucus* (Fuciales) and their role in phosphate-uptake. *J*  
447 *Phycol* **29**, 160-165. (doi:DOI 10.1111/j.0022-3646.1993.00160.x).
- 448 [11] Raven, J.A. 1981 Nutritional strategies of submerged benthic plants - the  
449 acquisition of C, N and P by rhizophytes and haptophytes. *New Phytologist* **88**, 1-30.
- 450 [12] Steen, H. 2003 Apical hair formation and growth of *Fucus evanescens* and *F.*  
451 *serratus* (Phaeophyceae) germlings under various nutrient and temperature regimes.  
452 *Phycologia* **42**, 26-30. (doi:DOI 10.2216/i0031-8884-42-1-26.1).
- 453 [13] Oates, B.R. & Cole, K.M. 1994 Comparative studies on hair cells of two  
454 agarophyte red algae, *Gelidium vagum* (Gelidiales, Rhodophyta) and *Gracilaria*  
455 *pacifica* (Gracilariales, Rhodophyta). *Phycologia* **33**, 420-433. (doi:doi:10.2216/i0031-  
456 8884-33-6-420.1).
- 457 [14] Hurd, C.L. 2000 Water motion, marine macroalgal physiology, and production. *J*  
458 *Phycol* **36**, 453-472. (doi:DOI 10.1046/j.1529-8817.2000.99139.x).
- 459 [15] Wheeler, W.N. 1980 Effect of boundary-layer transport on the fixation of carbon  
460 by the giant-kelp *Macrocystis pyrifera*. *Mar Biol* **56**, 103-110. (doi:Doi  
461 10.1007/Bf00397128).

- 462 [16] Spilling, K., Titelman, J., Greve, T.M. & Kühl, M. 2010 Microsensor  
463 measurements of the external and internal microenvironment of *Fucus vesiculosus*  
464 (Phaeophyceae). *J Phycol* **46**, 1350-1355. (doi:DOI 10.1111/j.1529-  
465 8817.2010.00894.x).
- 466 [17] Jørgensen, B.B. & Des Marais, D.J. 1990 The diffusive boundary layer of  
467 sediments - Oxygen microgradients over a microbial mat. *Limnol Oceanogr* **35**, 1343-  
468 1355.
- 469 [18] Kühl, M., Cohen, Y., Dalsgaard, T., Jørgensen, B.B. & Revsbech, N.P. 1995  
470 Microenvironment and photosynthesis of zooxanthellae in scleractinian corals studied  
471 with microsensors for O<sub>2</sub>, pH and light. *Mar Ecol Prog Ser* **117**, 159-172.
- 472 [19] de Beer, D., Kühl, M., Stambler, N. & Vaki, L. 2000 A microsensor study of light  
473 enhanced Ca<sup>2+</sup> uptake and photosynthesis in the reef-building hermatypic coral *Favia*  
474 *sp.* *Mar Ecol Prog Ser* **194**, 75-85.
- 475 [20] Jimenez, I.M., Kuhl, M., Larkum, A.W.D. & Ralph, P.J. 2011 Effects of flow and  
476 colony morphology on the thermal boundary layer of corals. *J R Soc Interface* **8**, 1785-  
477 1795. (doi:10.1098/rsif.2011.0144).
- 478 [21] Gundersen, J.K. & Jørgensen, B.B. 1990 Microstructure of diffusive boundary  
479 layers and the oxygen uptake of the sea floor. *Nature* **345**, 604-607.
- 480 [22] Røy, H., Hüttl, M. & Jørgensen, B.B. 2002 The role of small-scale sediment  
481 topography for oxygen flux across the diffusive boundary layer. *Limnol Oceanogr* **47**,  
482 837-847.
- 483 [23] Røy, H., Hüttl, M. & Jørgensen, B.B. 2005 The influence of topography on the  
484 functional exchange surface of marine soft sediments, assessed from sediment  
485 topography measured *in situ*. *Limnol Oceanogr* **50**, 106-112.
- 486 [24] Brodersen, K.E., Lichtenberg, M., Paz, L.-C. & Kühl, M. 2015 Epiphyte-cover on  
487 seagrass (*Zostera marina* L.) leaves impedes plant performance and radial O<sub>2</sub> loss from  
488 the below-ground tissue. *Frontiers in Marine Science* **2:58**.  
489 (doi:10.3389/fmars.2015.00058).
- 490 [25] Sand-Jensen, K., Revsbech, N.P. & Jørgensen, B.B. 1985 Microprofiles of oxygen  
491 in epiphyte communities on submerged macrophytes. *Mar Biol* **89**, 55-62. (doi:Doi  
492 10.1007/Bf00392877).
- 493 [26] Lichtenberg, M. & Kühl, M. 2015 Pronounced gradients of light, photosynthesis  
494 and O<sub>2</sub> consumption in the tissue of the brown alga *Fucus serratus*. *New Phytologist*  
495 **207**, 559-569. (doi:10.1111/nph.13396).
- 496 [27] Falkowski, P. & Raven, J.A. 2007 *Aquatic photosynthesis. 2. Edition.* 2 ed.  
497 Princeton, USA, Princeton University Press.
- 498 [28] Larkum, A.W.D., Koch, E.M.W. & Kühl, M. 2003 Diffusive boundary layers and  
499 photosynthesis of the epilithic algal community of coral reefs. *Mar Biol* **142**, 1073-  
500 1082. (doi:DOI 10.1007/s00227-003-1022-y).
- 501 [29] Raven, J.A. 1992 How benthic macroalgae cope with flowing fresh-water -  
502 resource acquisition and retention. *J Phycol* **28**, 133-146. (doi:DOI 10.1111/j.0022-  
503 3646.1992.00133.x).
- 504 [30] Cundell, A.M., Sleeter, T.D. & Mitchell, R. 1977 Microbial populations associated  
505 with the surface of the brown alga *Ascophyllum nodosum*. *Microbial Ecol* **4**, 81-91.
- 506 [31] Bolinches, J., Lemos, M.L. & Barja, J.L. 1988 Population dynamics of  
507 heterotrophic bacterial communities associated with *Fucus vesiculosus* and *Ulva rigida*  
508 in an estuary. *Microbial Ecol* **15**, 345-357. (doi:10.1007/bf02012647).



- 509 [32] Egan, S., Harder, T., Burke, C., Steinberg, P., Kjelleberg, S. & Thomas, T. 2013  
510 The seaweed holobiont: understanding seaweed-bacteria interactions. *Fems Microbiol*  
511 *Rev* **37**, 462-476. (doi:Doi 10.1111/1574-6976.12011).
- 512 [33] Bordenstein, S.R. & Theis, K.R. 2015 Host biology in light of the microbiome: Ten  
513 principles of holobionts and hologenomes. *PLoS Biology* **13**, e1002226.  
514 (doi:10.1371/journal.pbio.1002226).
- 515 [34] Lachnit, T., Blumel, M., Imhoff, J.F. & Wahl, M. 2009 Specific epibacterial  
516 communities on macroalgae: phylogeny matters more than habitat. *Aquat Biol* **5**, 181-  
517 186. (doi:10.3354/ab00149).
- 518 [35] Provasoli, L. & Pintner, I.J. 1980 Bacteria induced polymorphism in an axenic  
519 laboratory strain of *Ulva Lactuca* (Chlorophyceae). *J Phycol* **16**, 196-201. (doi:DOI  
520 10.1111/j.1529-8817.1980.tb03019.x).
- 521 [36] Stevens, C.L. & Hurd, C.L. 1997 Boundary-layers around bladed aquatic  
522 macrophytes. *Hydrobiologia* **346**, 119-128. (doi:Doi 10.1023/A:1002914015683).
- 523 [37] Huettel, M., Ziebis, W. & Forster, S. 1996 Flow-induced uptake of particulate  
524 matter in permeable sediments. *Limnol Oceanogr* **41**, 309-322.
- 525 [38] Haas, A.F., Gregg, A.K., Smith, J.E., Abieri, M.L., Hatay, M. & Rohwer, F. 2013  
526 Visualization of oxygen distribution patterns caused by coral and algae. *PeerJ* **1**, e106.  
527 (doi:10.7717/peerj.106).
- 528 [39] Bearman, P.W. 1984 Vortex shedding from oscillating bluff bodies. *Annual Review*  
529 *of Fluid Mechanics* **16**, 195-222.
- 530 [40] Nepf, H.M. 1999 Drag, turbulence, and diffusion in flow through emergent  
531 vegetation. *Water Resources Research* **35**, 479-489. (doi:10.1029/1998wr900069).
- 532 [41] Kaye, G.W.C. & Laby, T.H. 1995 *Tables of Physical & Chemical Constants (16th*  
533 *Edition)*. 16 ed.
- 534 [42] Nikora, V. 2010 Hydrodynamics of aquatic ecosystems: An interface between  
535 ecology, biomechanics and environmental fluid mechanics. *River Research and*  
536 *Applications* **26**, 367-384. (doi:10.1002/rra.1291).

## Figure legends

Figure 1. Fine-scale mapping of DBL around a single tuft of hyaline hairs on an illuminated *Fucus vesiculosus* thallus ( $350 \mu\text{mol photons m}^{-2} \text{s}^{-1}$ ). (A) and (B) 3D plots of *F. vesiculosus* thallus surface (grey area) and upper extension of DBL (coloured area) around a single tuft of hyaline hairs, at flow velocities of 1.65 (left panels) and 4.88  $\text{cm s}^{-1}$  (right panels). Colour bars depict the effective DBL thickness,  $Z_\delta$  (mm), and arrows indicate the direction of flow. (C) and (D) Transects in the x-direction (perpendicular to the flow), at position  $y=-2$  mm from Fig. 1 A,B, respectively, normalized to thallus surface showing the local  $\text{O}_2$  concentration. The zero position (0,0) indicates the position of the cryptostomata. Colour bars denote  $\text{O}_2$  concentration (in  $\mu\text{mol O}_2 \text{L}^{-1}$ ). (E) and (F) Transects of  $\text{O}_2$  concentration (in  $\mu\text{mol L}^{-1}$ ) measured across a single tuft of hyaline hairs in *Fucus vesiculosus* measured at flow velocities of 1.65 (E) and 4.88  $\text{cm s}^{-1}$  (F), in light ( $350 \mu\text{mol photons m}^{-2} \text{s}^{-1}$ ). The arrows indicate flow direction. The zero position (0,0) indicates the position of the cryptostomata, and transects were adjusted to the thallus surface. Colour bars denote  $\text{O}_2$  concentration (in  $\mu\text{mol O}_2 \text{L}^{-1}$ ).

Figure 2. Local transects of  $\text{O}_2$  concentration around single hair tufts from two different measurement series over an illuminated *Fucus vesiculosus* thallus ( $350 \mu\text{mol photons m}^{-2} \text{s}^{-1}$ ). (A) shows a transect taken from Fig. 1A at  $x=-0.5$  under a flow velocity of 1.65  $\text{cm s}^{-1}$ , while (B) was measured similarly as Fig. 1E, also at a flow velocity of 1.65  $\text{cm s}^{-1}$ . The hair tufts were 2.5-3 mm in diameter and protruded 3-3.5 mm from the thallus. Both transects were adjusted to the thallus surface. The black arrow indicates the flow direction. Colour bars denote  $\text{O}_2$  concentration (in  $\mu\text{mol O}_2 \text{L}^{-1}$ ).

Figure 3. Mapping of DBL over several tufts of hyaline hairs on an illuminated *Fucus vesiculosus* thallus ( $350 \mu\text{mol photons m}^{-2} \text{s}^{-1}$ ). (A) and (B) 3D plot of *F. vesiculosus* thallus surface (grey area) and the upper extension of the DBL (coloured area) of multiple tufts of hyaline hairs under a flow velocity 1.65 (left panels) and 4.88  $\text{cm s}^{-1}$  (right panels). Colour bars depict the effective DBL thickness,  $Z_\delta$  (mm). (C) and (D) Transects of  $\text{O}_2$  concentration at position  $x=1$  (along the y-axis direction) normalized to thallus surface. Colour bars denote  $\text{O}_2$  concentration (in  $\mu\text{mol O}_2 \text{L}^{-1}$ ).

Figure 4. Isoleths of O<sub>2</sub> flux (in nmol O<sub>2</sub> cm<sup>-2</sup> s<sup>-1</sup>) (A) and (C) and effective DBL thickness, Z<sub>δ</sub> (in mm) (B) and (D) measured over an illuminated *Fucus vesiculosus* thallus (350 μmol photons m<sup>-2</sup> s<sup>-1</sup>) around a single tuft of hyaline hairs at flow velocities of 1.65 cm s<sup>-1</sup> (A, B) and 4.88 cm s<sup>-1</sup> (C, D). The hyaline hairs were rooted in the cryptostomata located at the (0,0) coordinate, as indicated by the black cross. Black arrows indicate the flow direction.

Figure 5. Comparison of O<sub>2</sub> flux values (in nmol O<sub>2</sub> cm<sup>-2</sup> s<sup>-1</sup>) calculated from transects of O<sub>2</sub> concentration profiles measured over an illuminated (350 μmol photons m<sup>-2</sup> s<sup>-1</sup>) intact *Fucus vesiculosus* thallus with several tufts of hyaline hairs (A) and a thallus with only a single hair tuft (B) measured under flow velocities of 1.65 cm s<sup>-1</sup> and 4.88 cm s<sup>-1</sup>. Note the difference in x-scale. The black arrow indicates the flow direction. The individual position of the multiple hairtufts in panel (A) were not mapped and the zero position on the x-axis thus only reflects the starting point of the transect. In panel (B), the zero position indicates the centre of the cryptostomata. Panel (C) and (D) show the average O<sub>2</sub> flux (±SEM) across (C) the intact thallus and (D) the thallus with a single hair tuft protruding.

Figure 6. Conceptual drawing showing possible scenarios for the observed upwelling of O<sub>2</sub> downstream of the hyaline hairs. Flow velocity (straight black lines) decreases from the free stream velocity as the thallus surface is approached through the diffusive boundary layer (DBL). The hyaline hair tuft protruding from cryptostomata alters the DBL thickness locally and creates a differential pressure field (shown in gradient blue and red colours) due to the smaller cross section of unobstructed flow. This creates a flow acceleration in the areas of relative low pressure which could result in advective upwelling. In addition, an adverse pressure gradient is generated downstream from the hair tuft potentially resulting in vortex shedding.

## Figures

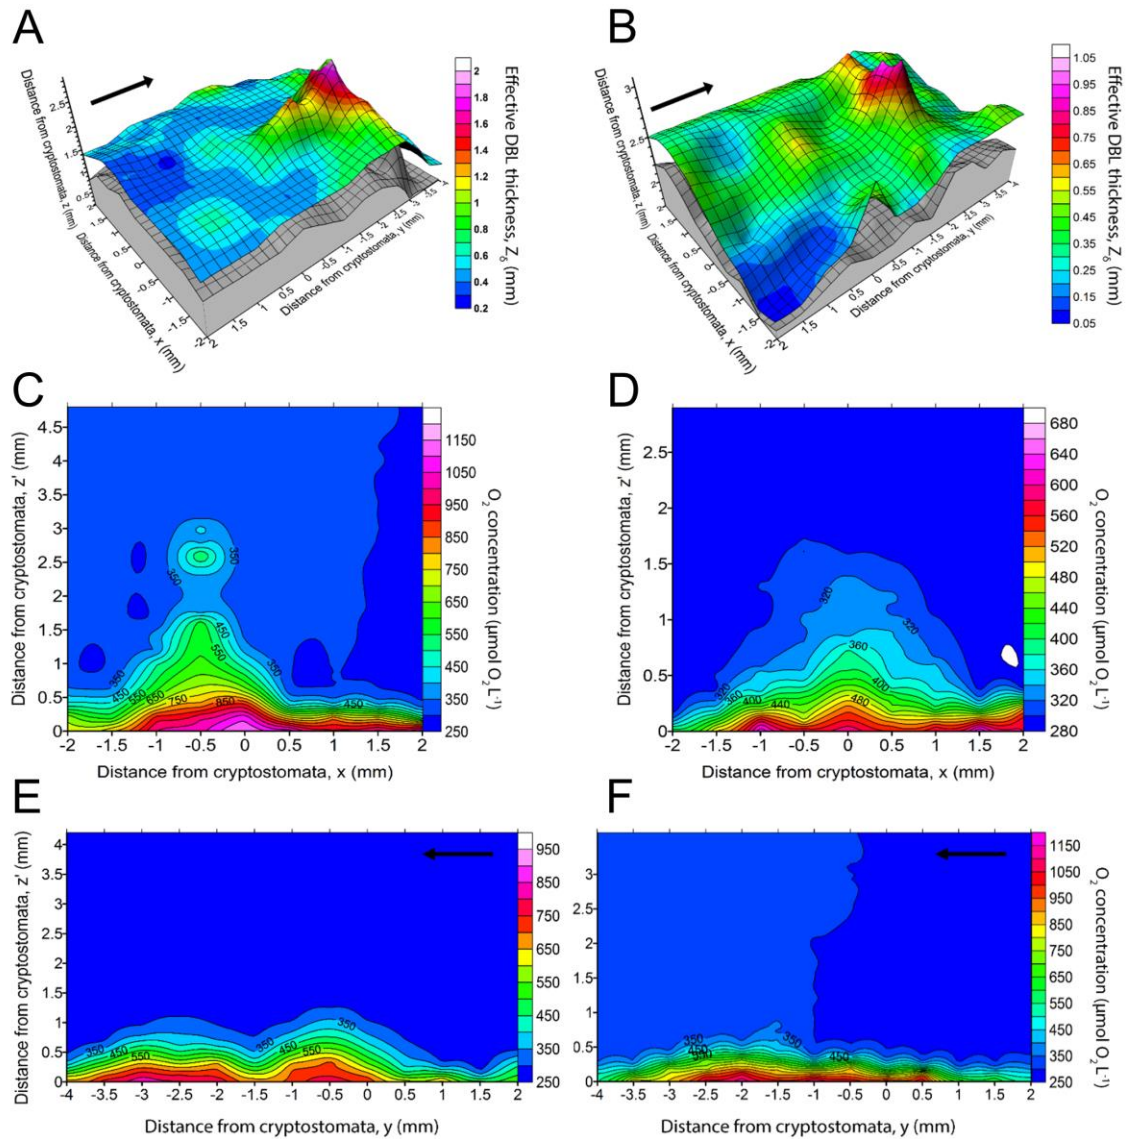

Figure 1

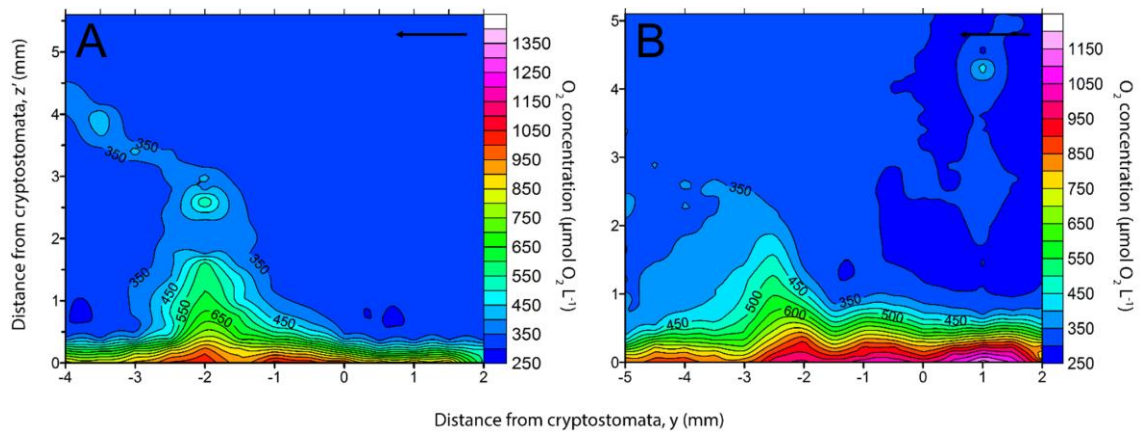

Figure 2

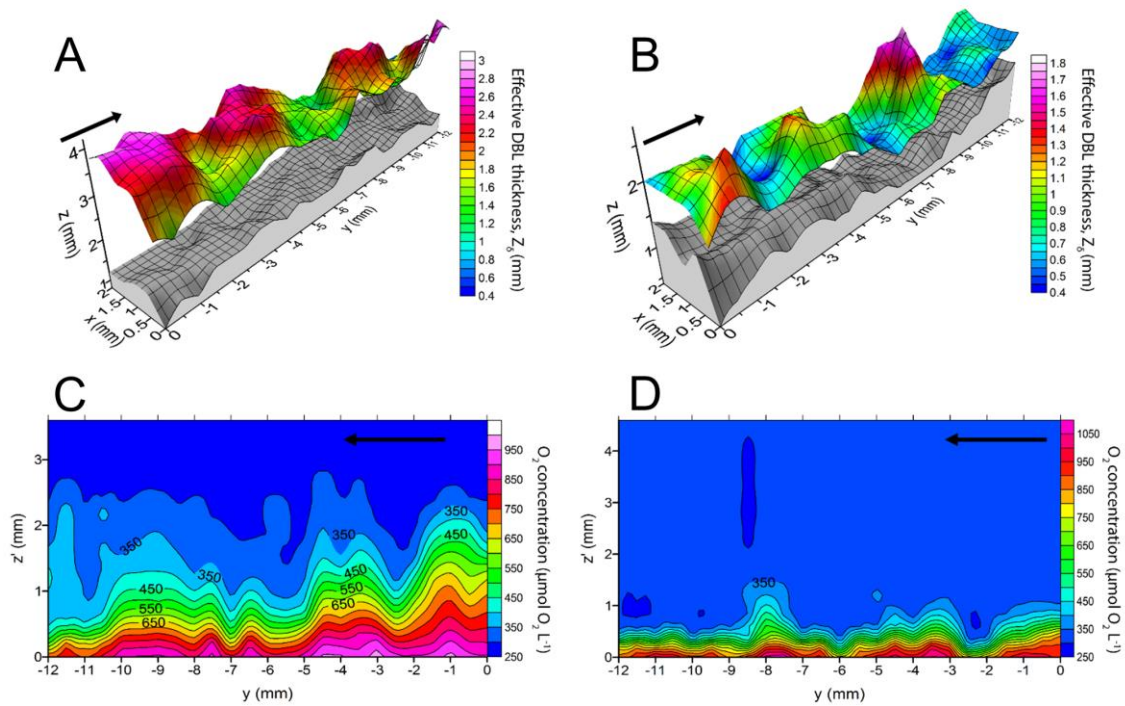

Figure 3

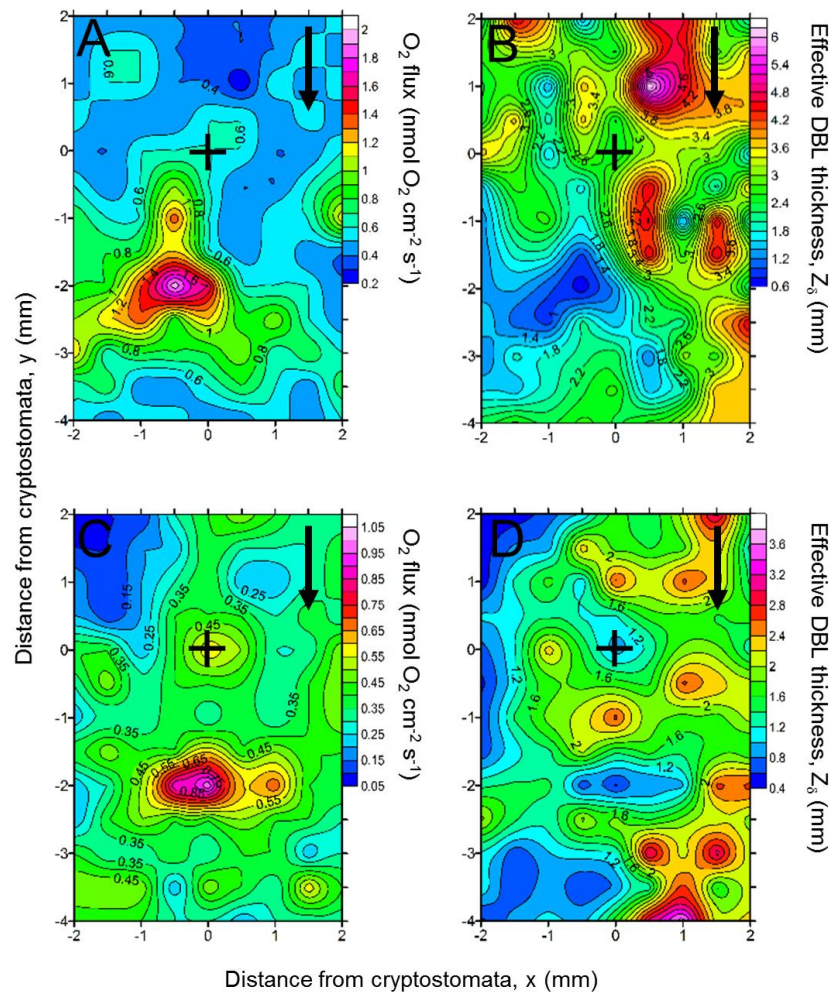

Figure 4

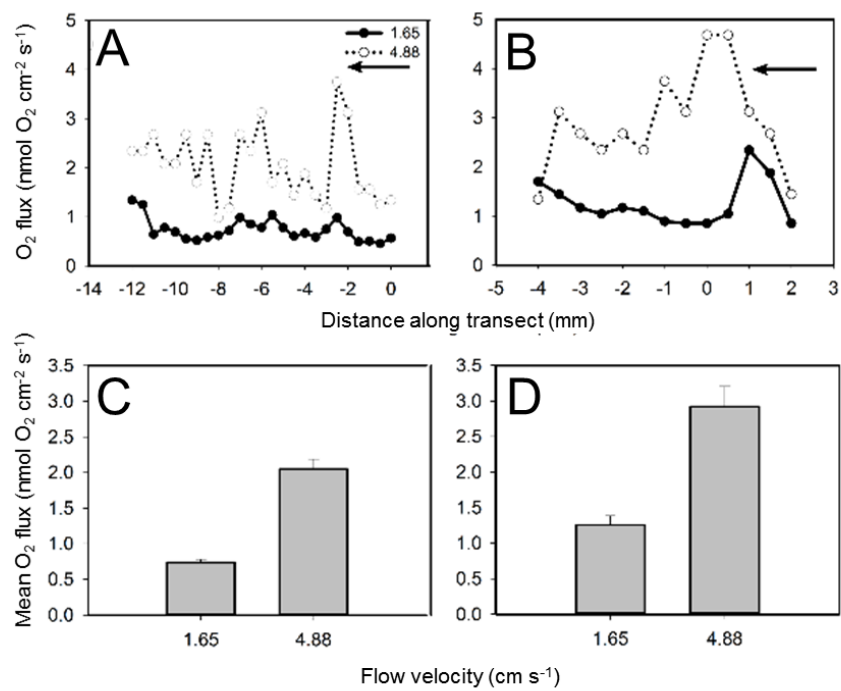

Figure 5

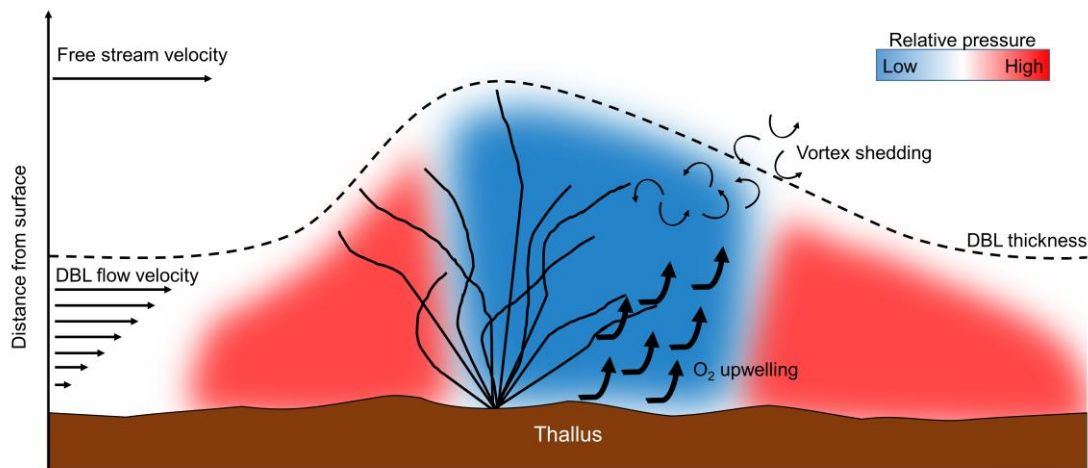

Figure 6
